# Supplementary material for: De novo transcriptome assembly and population genetic analyses of an important coastal shrub, Apocynum venetum L
Source: PubMed Central journal article supplement (PMC7470449; doi:10.1186/s12870-020-02626-7), 2020-09-03

(A)

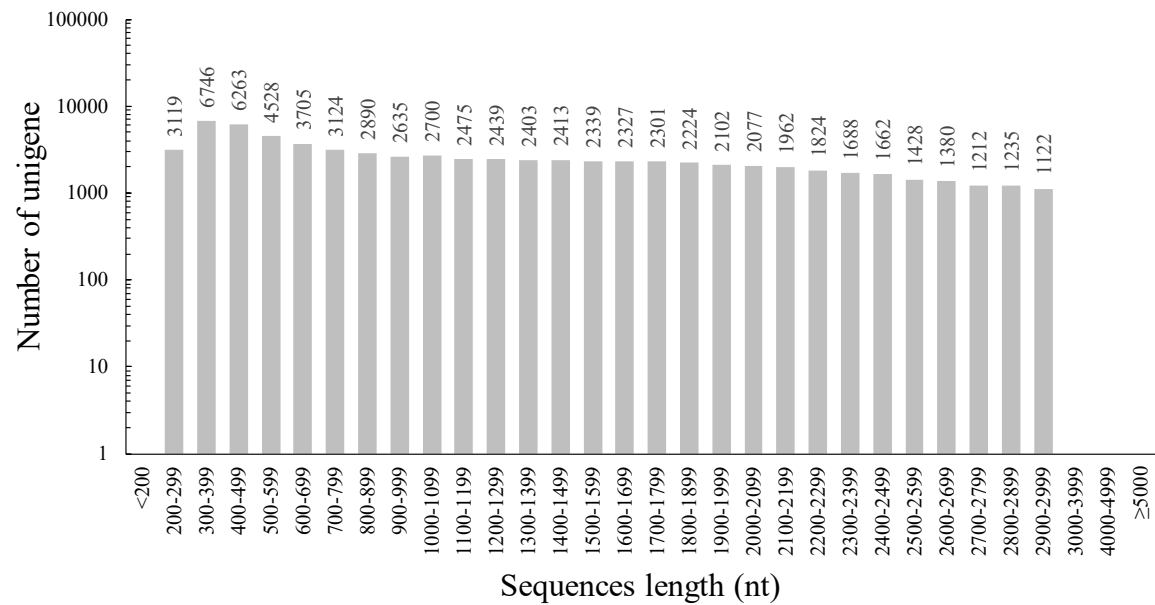

(B)

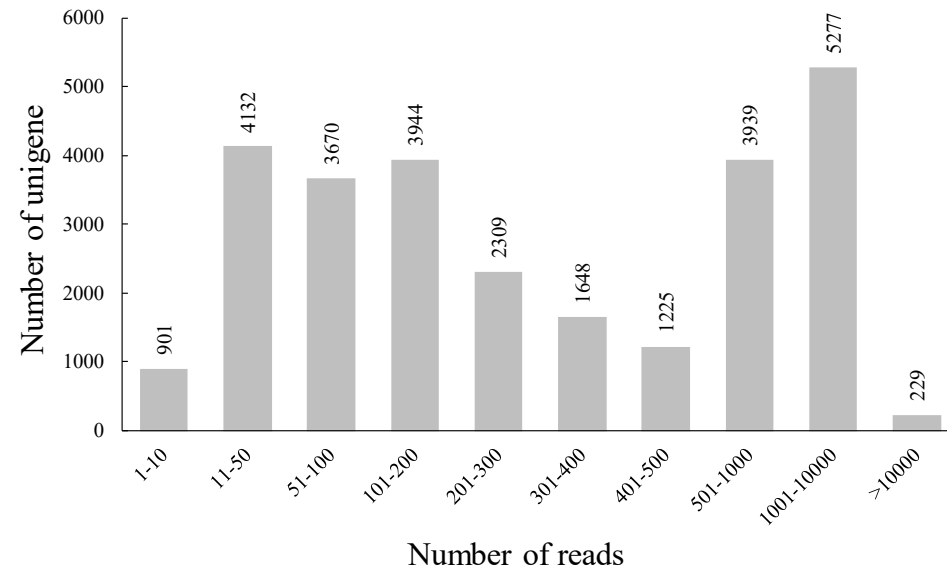

Supplement: 12870_2020_2626_MOESM1_ESM.pdf [file 12870_2020_2626_MOESM1_ESM.pdf]
