# Supplementary material for: De novo transcriptome assembly and population genetic analyses of an important coastal shrub, Apocynum venetum L
Source: PubMed Central journal article supplement (PMC7470449; doi:10.1186/s12870-020-02626-7), 2020-09-03
Supplement: 12870_2020_2626_MOESM2_ESM.pdf [file 12870_2020_2626_MOESM2_ESM.pdf]

# KOG Function Classification

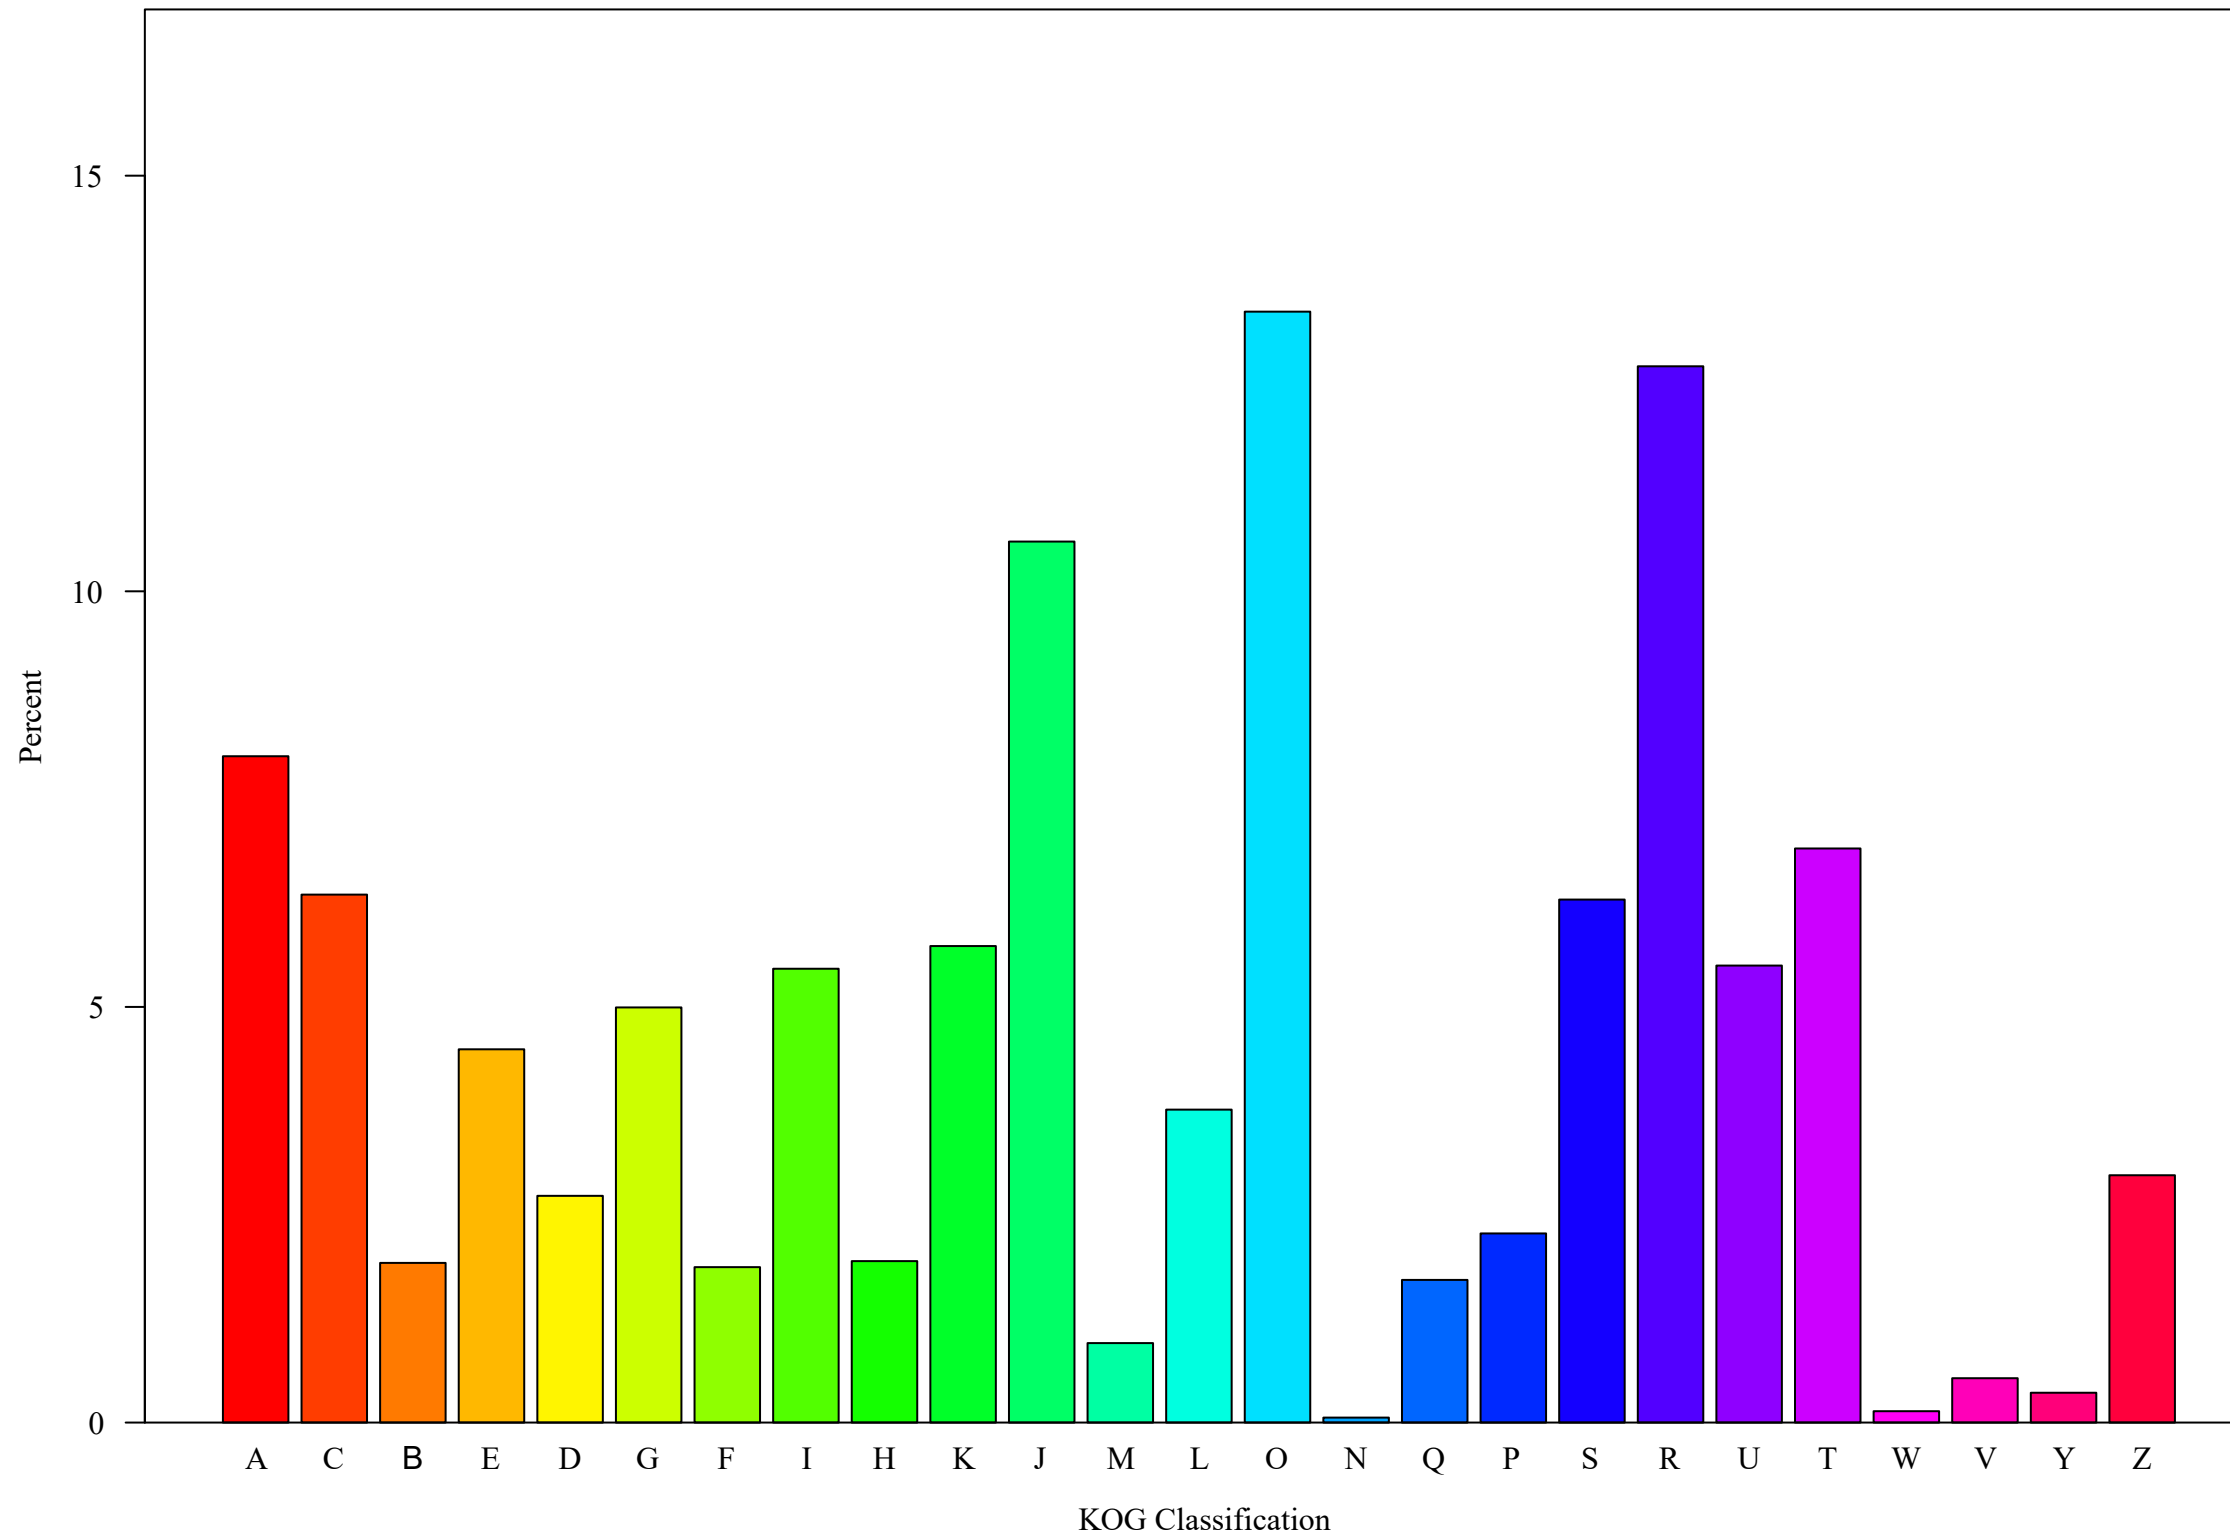

- [A] RNA processing and modification
- [C] Energy production and conversion
- [B] Chromatin structure and dynamics
- [E] Amino acid transport and metabolism
- [D] Cell cycle control, cell division, chromosome partitioning
- [G] Carbohydrate transport and metabolism
- [F] Nucleotide transport and metabolism
- [I] Lipid transport and metabolism
- [H] Coenzyme transport and metabolism
- [K] Transcription
- [J] Translation, ribosomal structure and biogenesis
- [M] Cell wall/membrane/envelope biogenesis
- [L] Replication, recombination and repair
- [O] Posttranslational modification, protein turnover, chaperones
- [N] Cell motility
- [Q] Secondary metabolites biosynthesis, transport and catabolism
- [P] Inorganic ion transport and metabolism
- [S] Function unknown
- [R] General function prediction only
- [U] Intracellular trafficking, secretion, and vesicular transport
- [T] Signal transduction mechanisms
- [W] Extracellular structures
- [V] Defense mechanisms
- [Y] Nuclear structure
- [Z] Cytoskeleton
